# Supplementary material for: Netrin-1 functions as a suppressor of bone morphogenetic protein (BMP) signaling
Source: PubMed Central journal article supplement (PMC8060280; doi:10.1038/s41598-021-87949-7), 2021-04-21

## **SUPPLEMENTARY INFORMATION**

### **Netrin-1 functions as a suppressor of bone morphogenetic protein (BMP) signaling**

Ahmad Abdullah<sup>†,1</sup>, Carl Herdenberg<sup>†,1</sup>, and Håkan Hedman<sup>1,\*</sup>

<sup>†</sup>These authors contributed equally to the work

<sup>1</sup>Department of Radiation Sciences, Umeå University, SE-90187 Umeå, Sweden

#### **\*Correspondence**

H. Hedman, Oncology Research Laboratory, NUS M31, SE-90185 Umeå, Sweden

Tel: +46-90-785 2881

E-mail: hakan.hedman@umu.se

## SUPPLEMENTARY INFORMATION

### Figure legends

**Supplementary Figure S1. Western blot analyses of *Ntn1*-deficient and control MEF lines.** Netrin-1 expression was knocked out in wild-type MEFs or *Lrig*-null MEFs with inducible *LRIG1* or *LRIG3* alleles using CRISPR/Cas9 followed by cell cloning. Protein expression was evaluated via Western blotting using antibodies against netrin-1, the FLAG epitope present on the inducible LRIG1 and LRIG3 proteins, or actin as the loading control. **(a)** Blots showing wild-type MEFs (ScA1, ScA3, ScC3, and ScD2) and *Ntn1*<sup>-/-</sup>;*Lrig*-wild-type MEFs (G2B2, G2A2, and G2C1). **(b)** Blots showing LRIG1-inducible *Ntn1*<sup>-/-</sup> MEFs that had not been induced (-dox) or had been induced (+dox) to express LRIG1. **(c)** Blots showing LRIG3-inducible *Ntn1*<sup>-/-</sup> MEFs that had not been induced (-dox) or had been induced (+dox) to express LRIG3. Uncropped blots are shown in Figure S9.

**Supplementary Figure S2. Receptor levels in MEFs of different *Lrig* and *Ntn1* genotypes.** **(a-c)** Expression levels of *Bmpr2*, *Acvr1*, and *Smad1* in MEFs of different *Ntn1* (*Ntn1*<sup>+/+</sup> or *Ntn1*<sup>-/-</sup>) and *Lrig* (*Lrig*-wild-type or *Lrig*-null (*Lrig1*<sup>-/-</sup>; *Lrig2*<sup>-/-</sup>; *Lrig3*<sup>-/-</sup>) genotypes analyzed by Western blotting. Graphs represent average means with standard deviations of band intensity ratios (neogenin/actin) from four *Ntn1*<sup>+/+</sup>;*Lrig*-wild-type or *Ntn1*<sup>+/+</sup>;*Lrig*-null biological replicates and three *Ntn1*<sup>-/-</sup>;*Lrig*-wild-type or *Ntn1*<sup>-/-</sup>;*Lrig*-null biological replicates that were determined with three independent experiments. **(d)** Representative blots of the four clones of wild-type and three clones each of *Lrig*-wild-type/*Ntn1*<sup>-/-</sup> and *Lrig*-null/*Ntn1*<sup>-/-</sup>, respectively.

**Supplementary Figure S3. *Lrig* and netrin-1 expression levels in MEFs of different *Ntn1* and *Lrig* genotypes.** **(a-d)** Expression of *Lrig* proteins in wild-type and *Ntn1*-deficient MEF lines. **(a, c)** Representative blots showing *Lrig1* and *Lrig3* expression in four clones of wild-type MEFs and three clones of *Ntn1*-deficient MEFs. **(e)** Representative blot showing netrin-1 expression in four clones each of wild-type and *Lrig*-null MEF lines. **(b, d, f)** Graphs showing the average means with standard deviations of four independent experiments. Uncropped blots are shown in Figure S10.

**Supplementary Figure S4. Full-length blots.** Shown are the full-length blots corresponding to the cropped versions shown in Figure 2.

**Supplementary Figure S5. Western blot analyses of wild-type and *Neol*-deficient MEF lines.** **(a)** Representative blots showing the expression of neogenin, netrin-1, *Lrig1*, *Lrig3*, and actin as loading control in four clones of *Neol* wild-type (S1, S2, S3, and S4) and *Neol*-deficient (1A1, 1B1, 1B2, and 2C4) MEF lines. Uncropped blots are shown in Figure S11. **(b-d)** Graphs representing average means with standard deviations for the expression of *Lrig1*, *Lrig3*, and netrin-1 in *Neol* wild-type and *Neol*-deficient MEF lines from four biological repeats. **(e)** Neogenin expression in wild-type MEFs treated or not treated with 10 ng/ml

BMP4 for 60 minutes. Shown are the average means and standard deviations from four independent experiments.

**Supplementary Figure S6. Neogenin levels in LRIG1- and LRIG3-inducible *Ntn1*-deficient MEFs.** Effects of induced expression of LRIG1 (a) and LRIG3 (b) on neogenin expression levels in *Ntn1*-deficient MEFs. LRIG expression was induced through the treatment of LRIG-inducible MEFs with 100 ng/ml doxycycline overnight. Neogenin and actin levels were analyzed using Western blotting. Representative blots and graphs representing average means with standard deviations of four independent experiments are shown. (Student's t-test; \*\*\*,  $p < 0.001$ ). Uncropped blots are shown in Figure S12.

**Supplementary Figure S7. Full-length blots.** Shown are the full-length blots corresponding to the cropped versions shown in Figure 3. Red squares indicate the parts that were displayed in Figure 3.

**Supplementary Figure S8. Netrin-1 and noggin inhibit BMP4-induced ATDC5 cell chondrogenesis.** ATDC5 cells were treated with (a) different concentrations of BMP4 in the absence or presence of netrin-1 (0.25  $\mu\text{g/ml}$ ) or noggin (10 ng/ml), or (b) different concentrations of noggin in the absence or presence of BMP4 (5 ng/ml) for 72 hours. Thereafter, chondrogenesis was assessed via an alkaline phosphatase (ALP) assay. Graphs represent the average means with standard deviations from four independent experiments. One-way ANOVA: #####,  $p < 0.0001$ .

**Supplementary Figure S9. Full-length blots.** Shown are the full-length blots corresponding to the cropped versions shown in Figure S1. Red squares indicate the parts that were displayed in Figure S1.

**Supplementary Figure S10. Full-length blots.** Shown are the full-length blots corresponding to the cropped versions shown in Figure S3. Red squares indicate the parts that were displayed in Figure S3.

**Supplementary Figure S11. Full-length blots.** Shown are the full-length blots corresponding to the cropped versions shown in Figure S5. Red squares indicate the parts that were displayed in Figure S5.

**Supplementary Figure S12. Full-length blots.** Shown are the full-length blots corresponding to the cropped versions shown in Figure S6. Red squares indicate the parts that were displayed in Figure S6.

**SUPPLEMENTARY INFORMATION****Tables****Table S1.** Antibodies used in the study.

| Antigen and antibody conjugate | Host   | Company                   | Catalog no. | Lot no.     | Application <sup>a</sup> | Dilution                     |
|--------------------------------|--------|---------------------------|-------------|-------------|--------------------------|------------------------------|
| Netrin-1                       | Rabbit | Abcam                     | ab126729    | GR250605-25 | WB                       | 1:1,000                      |
| Neogenin                       | Rabbit | Novus Biologicals         | NBP1-89651  | A91773      | WB                       | 1:1,000                      |
| Bmpr2                          | Mouse  | Fisher Scientific         | 3F6 F8      | td269789    | WB                       | 1:500                        |
| ACVR1                          | Rabbit | Novus Biologicals         | NBP1-33500  | 40142       | WB                       | 1:500                        |
| Smad1                          | Rabbit | Cell Signaling Technology | 6944S       | 5           | WB                       | 1:1,000                      |
| Actin                          | Mouse  | Cell Signaling Technology | 3700        | 17          | WB                       | 1:5,000                      |
| pSmad1/5                       | Rabbit | Cell Signaling Technology | 9516        | 9           | WB, ICC                  | 1:1,000 (WB), 1:800 (ICC)    |
| FLAG M2                        | Mouse  | Sigma-Aldrich             | F3165       | SLBN8915 V  | WB, ICC                  | 1:20,000 (WB), 1:2,000 (ICC) |
| Mouse IgG IRDye 800CW          | Goat   | LI-COR Biosciences        | 926-32210   | C81106-03   | WB                       | 1:15,000                     |
| Rabbit IgG IRDye 680RD         | Goat   | LI-COR Biosciences        | 925-68071   | C60606-01   | WB                       | 1:15,000                     |
| Alexa fluor anti-rabbit 647    | Goat   | Invitrogen                | A21245      | 2098544     | ICC                      | 1:1,000                      |
| Alexa fluor anti-mouse 488     | Donkey | Invitrogen                | A21202      | 13053       | ICC                      | 1:1,000                      |

<sup>a</sup>WB, Western blotting; ICC, immunocytochemistry

# Supplementary Figure S1

**a**

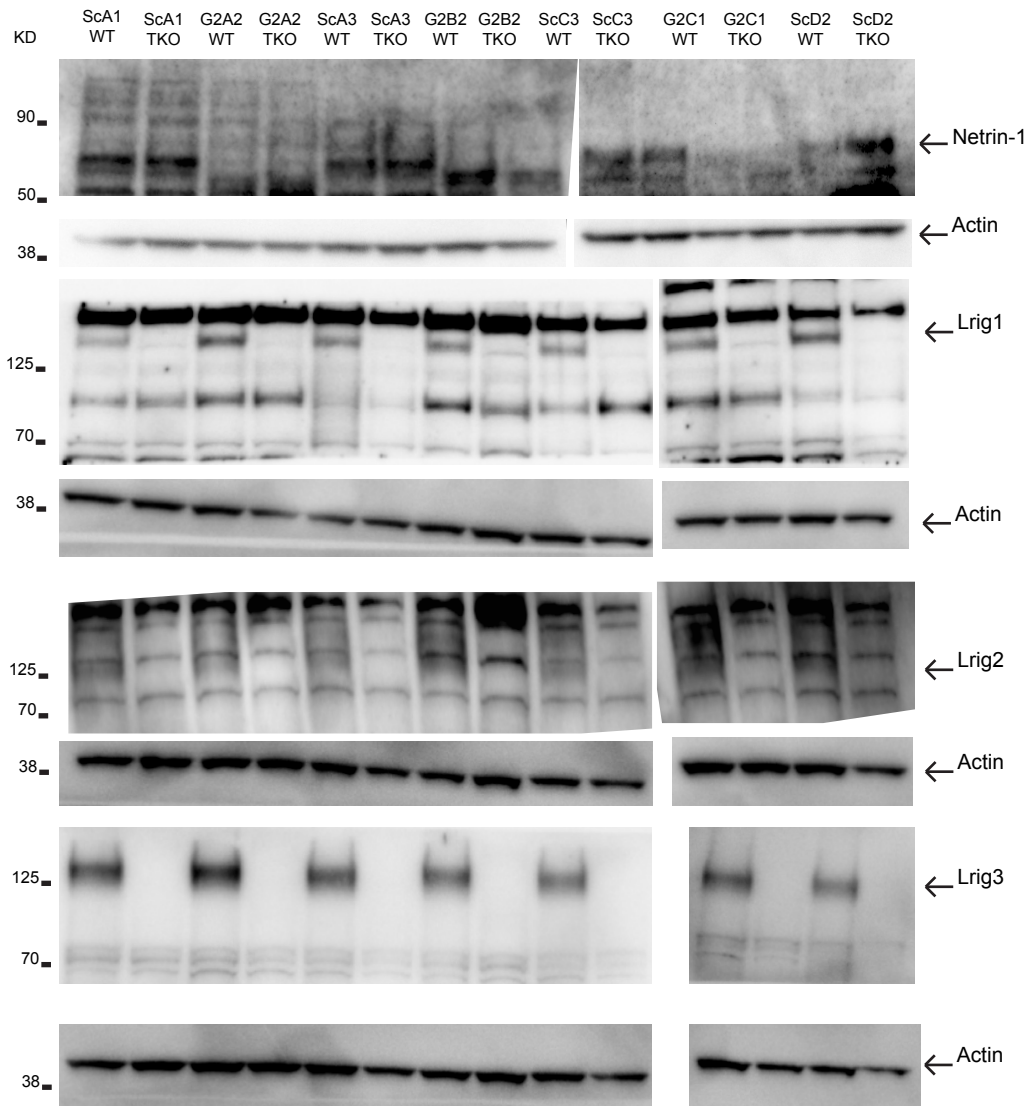

**b**

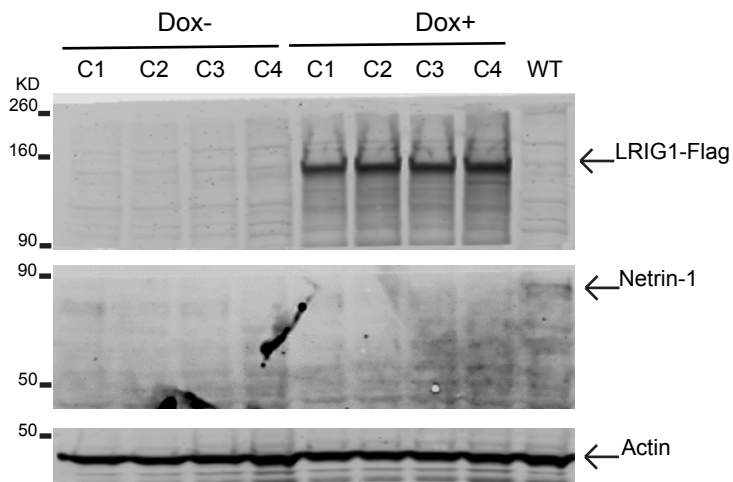

**c**

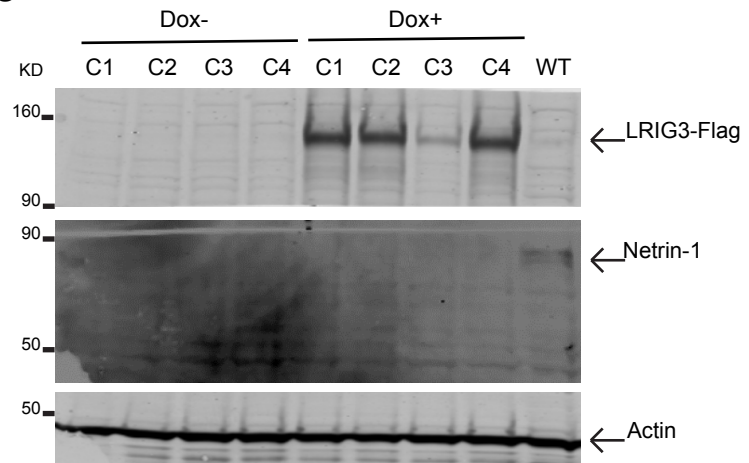

# Supplementary Figure S2

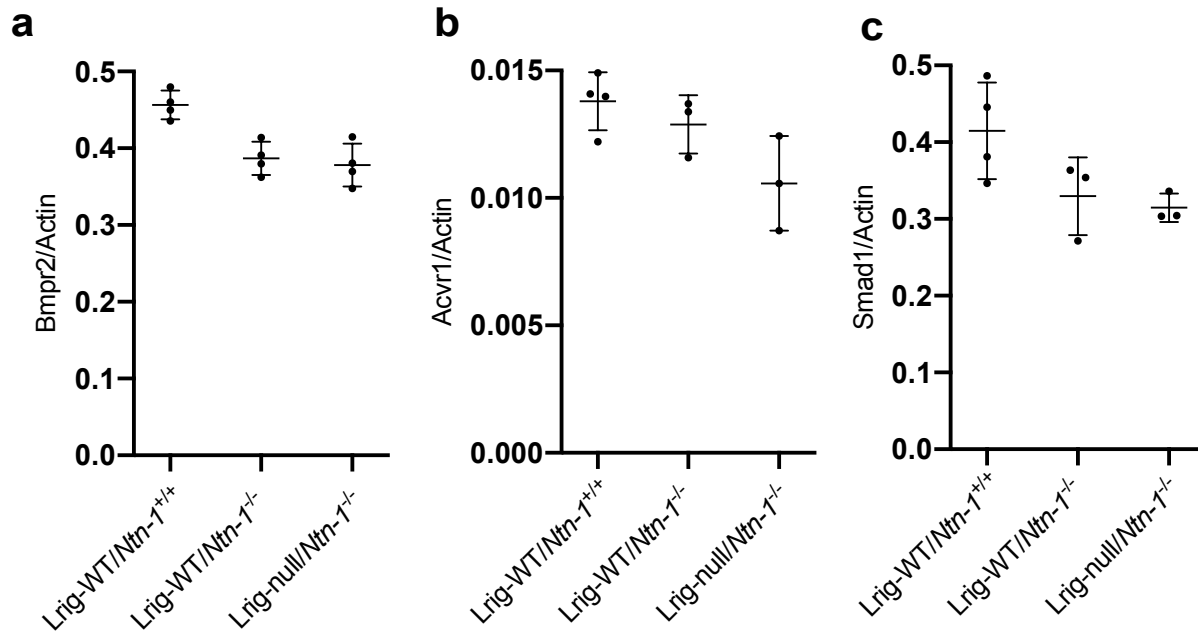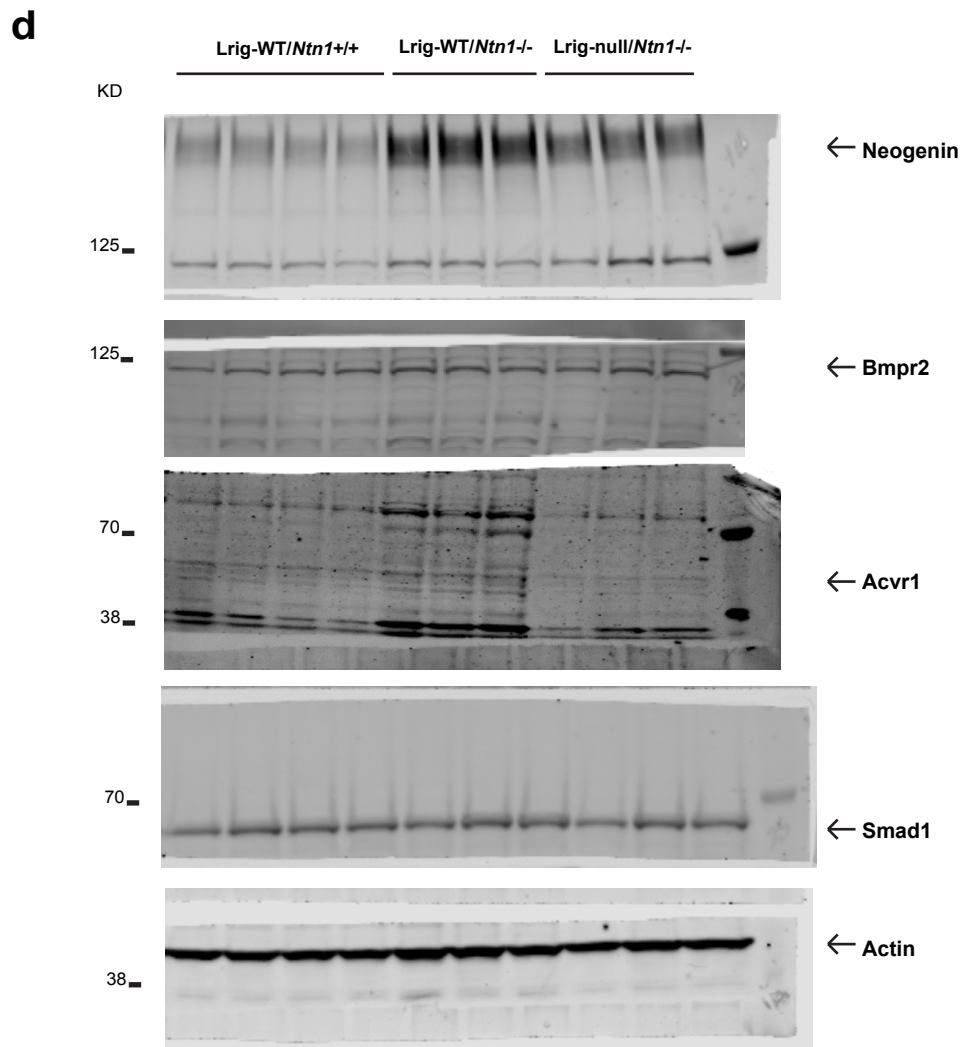

# Supplementary Figure S3

**a**

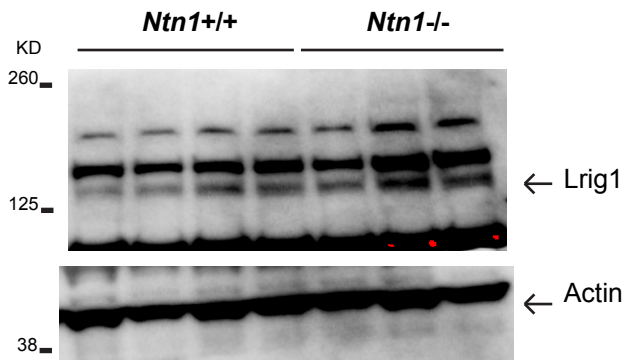

**b**

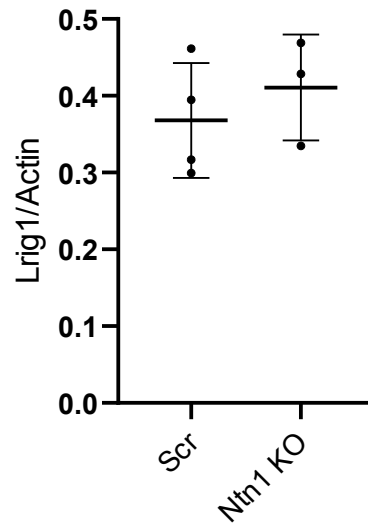

**c**

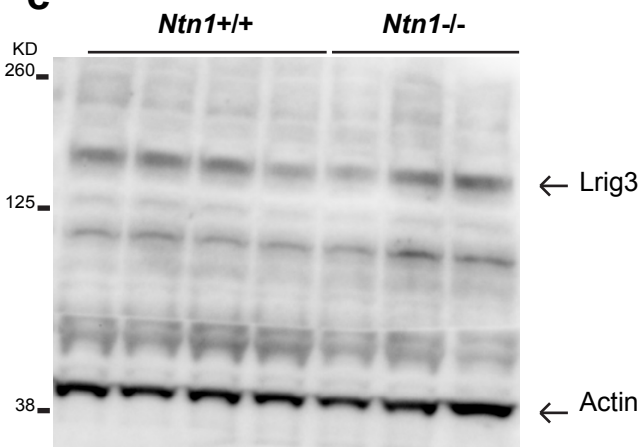

**d**

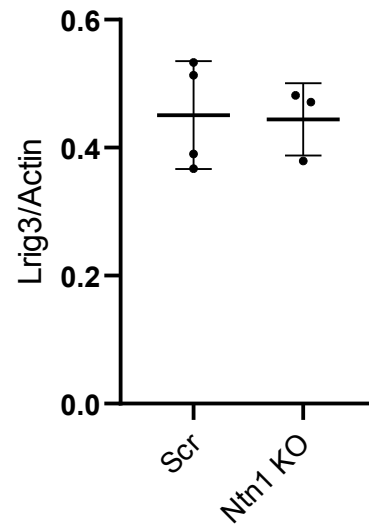

**e**

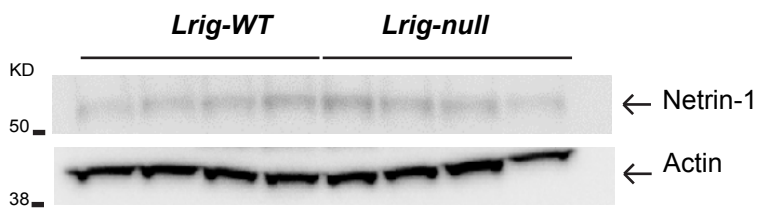

**f**

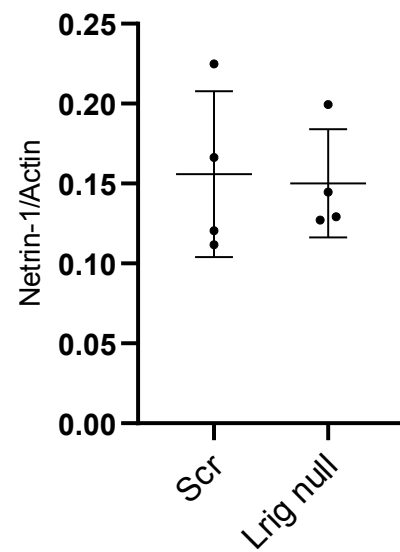

# Supplementary Figure S4

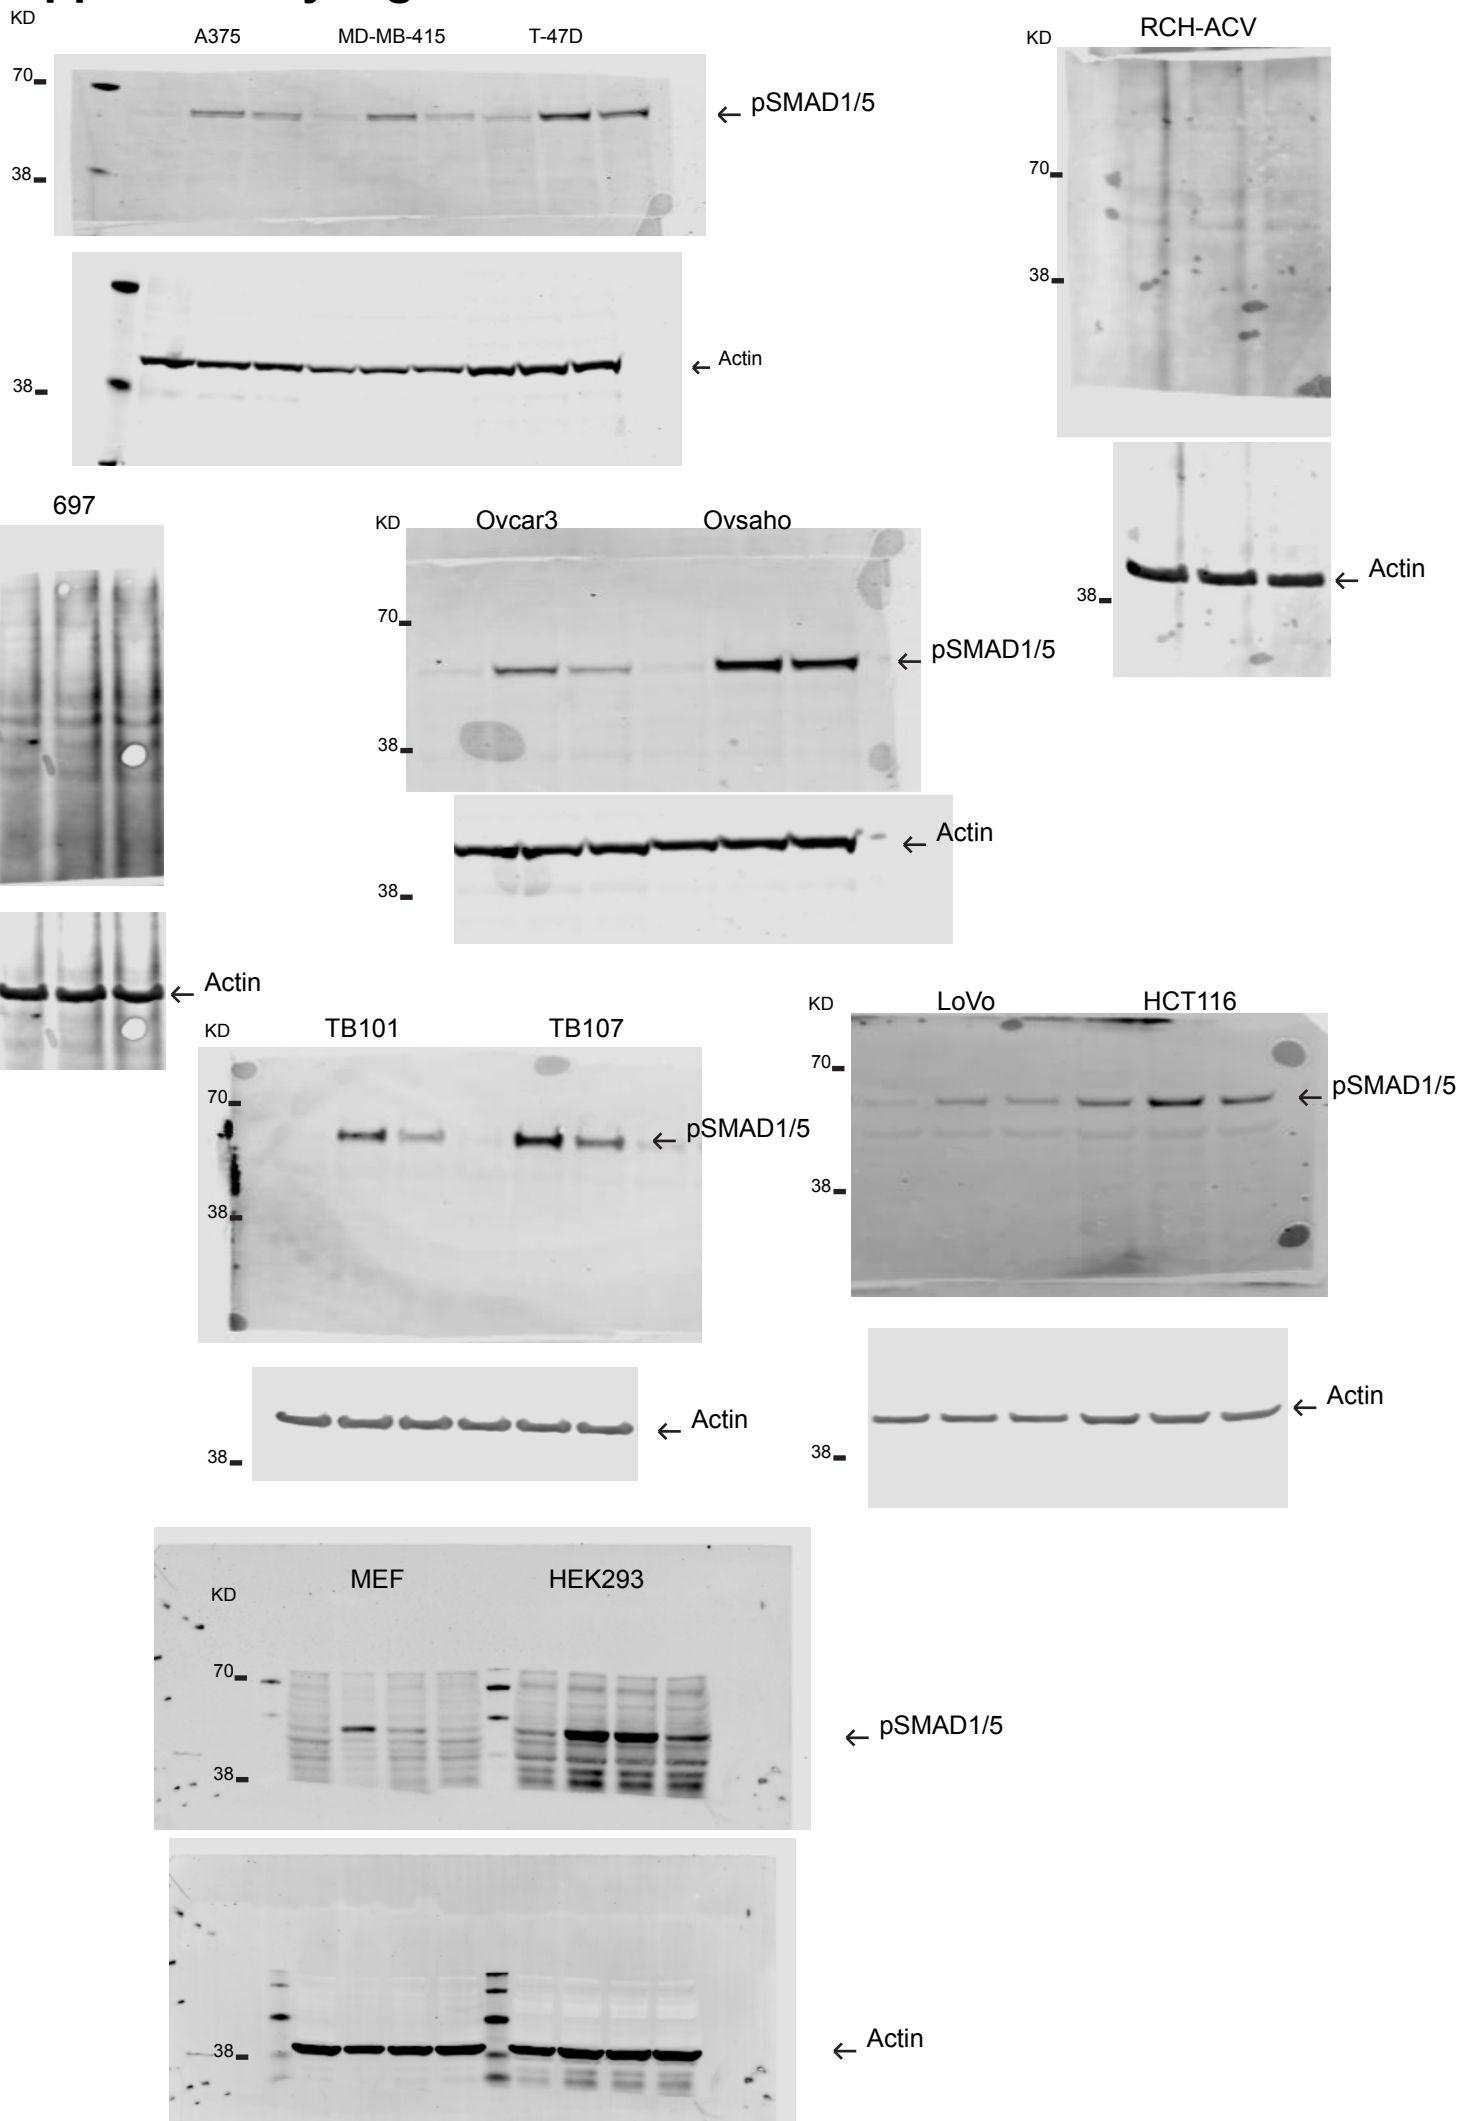



# Supplementary Figure S5

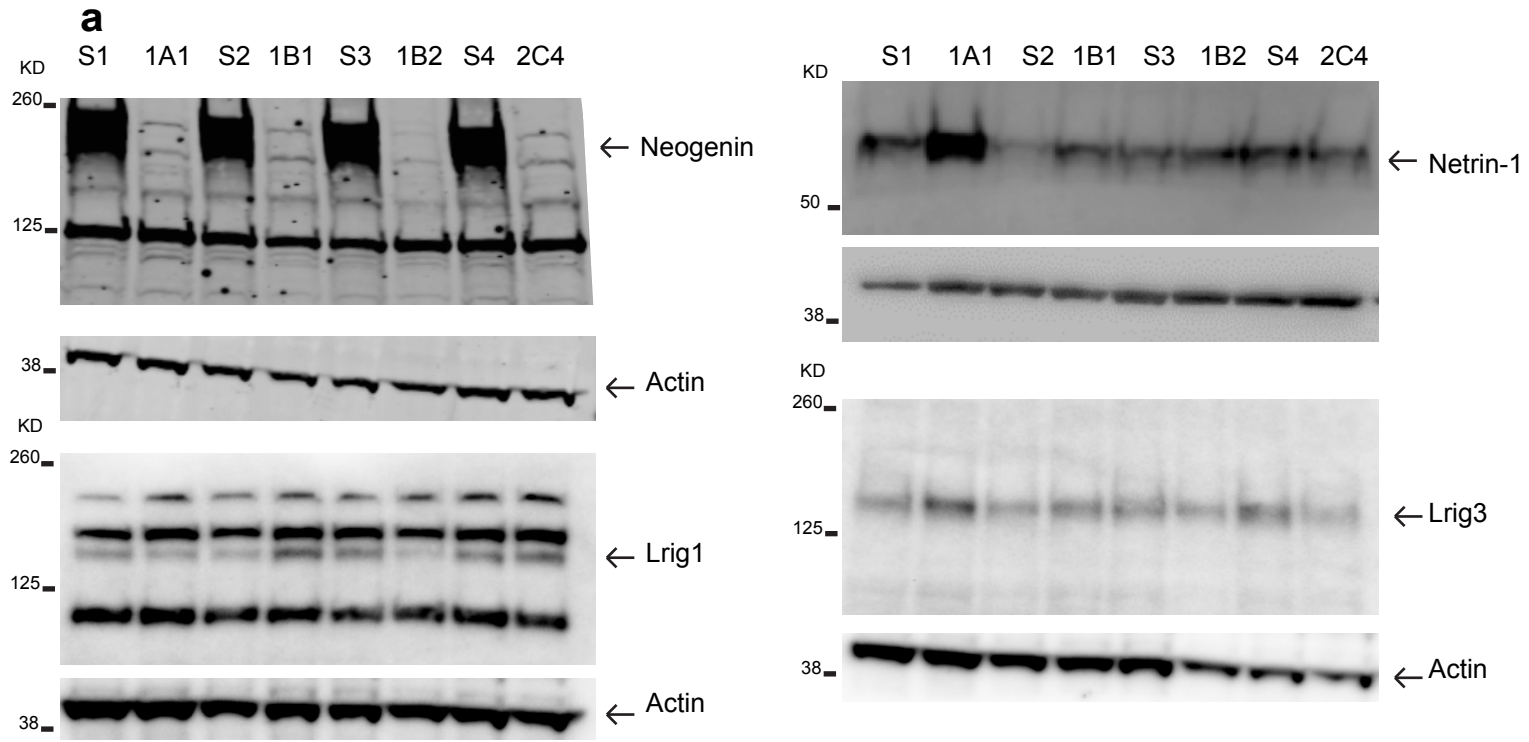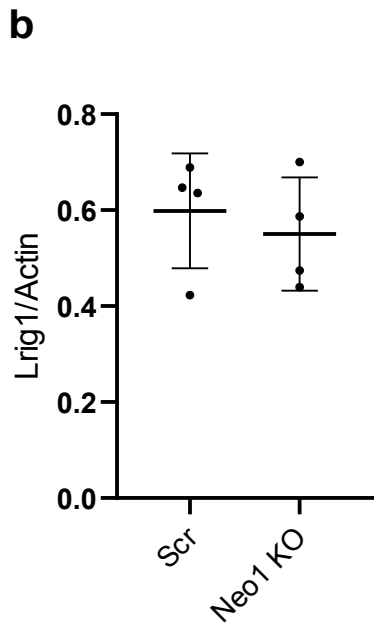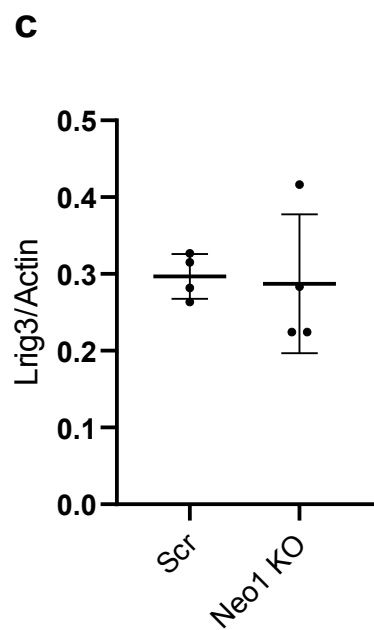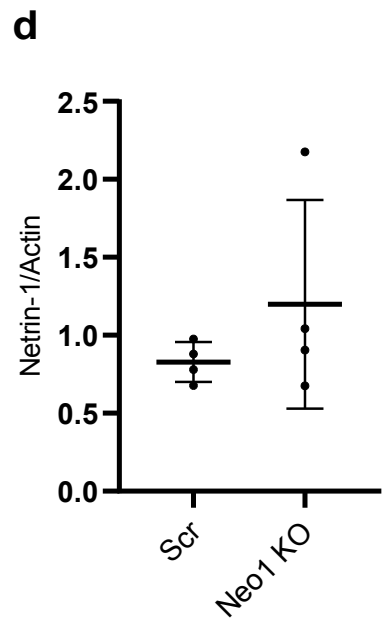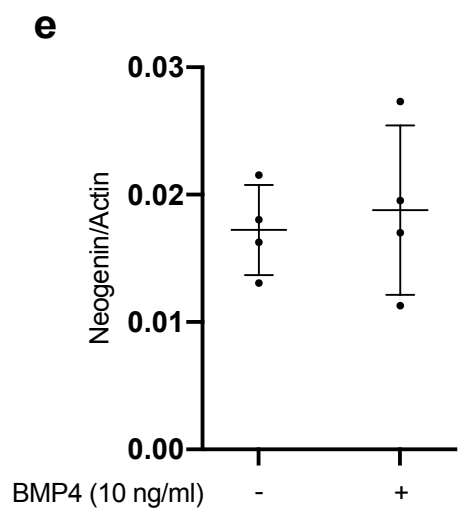

# Supplementary Figure S6

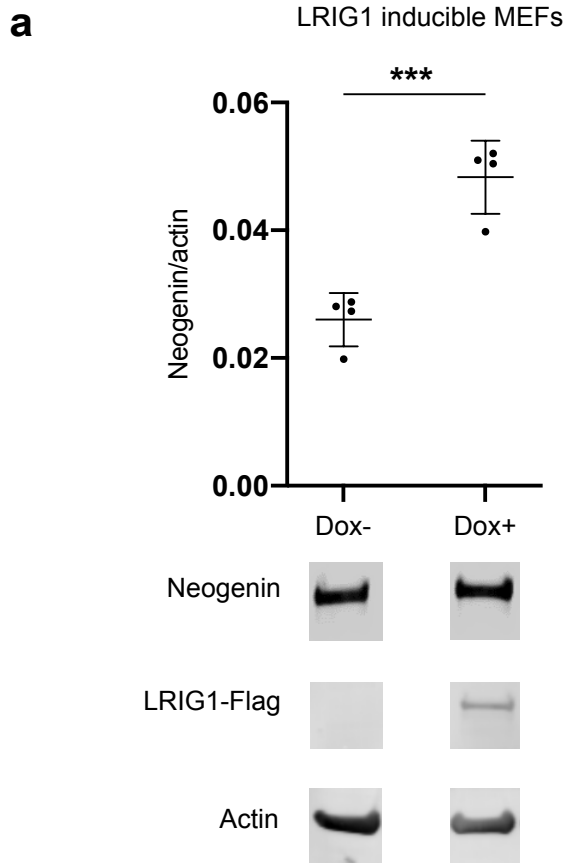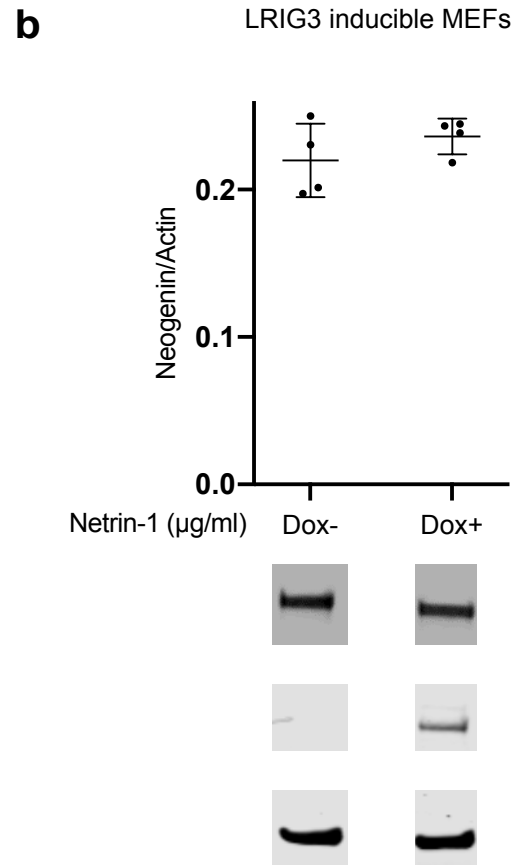

# Supplementary Figure S7

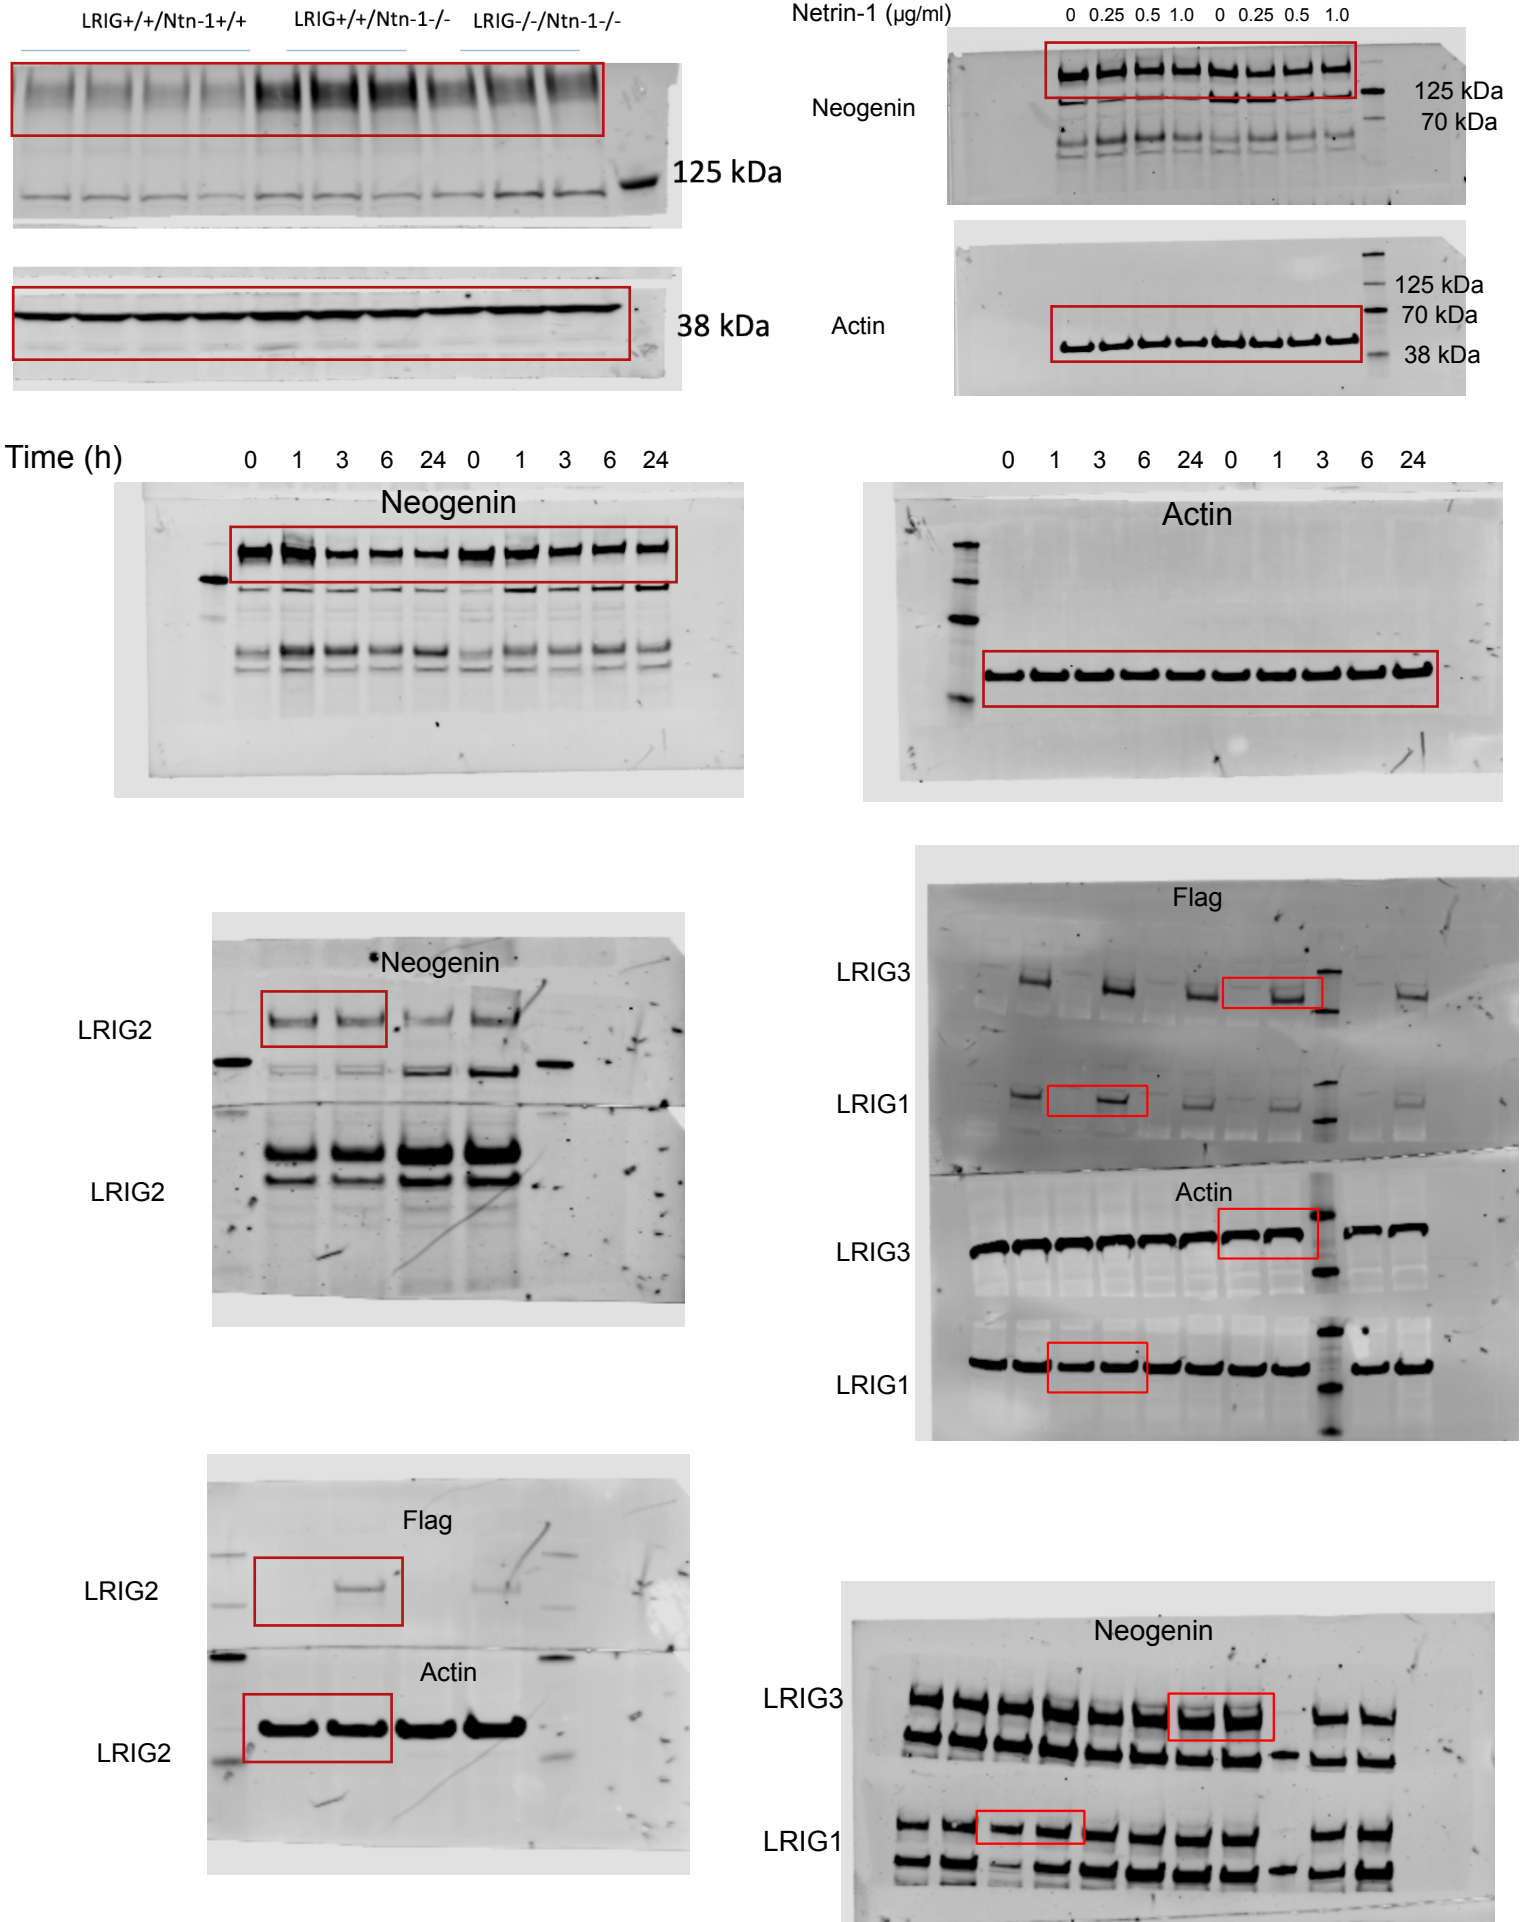

# Supplementary Figure S8

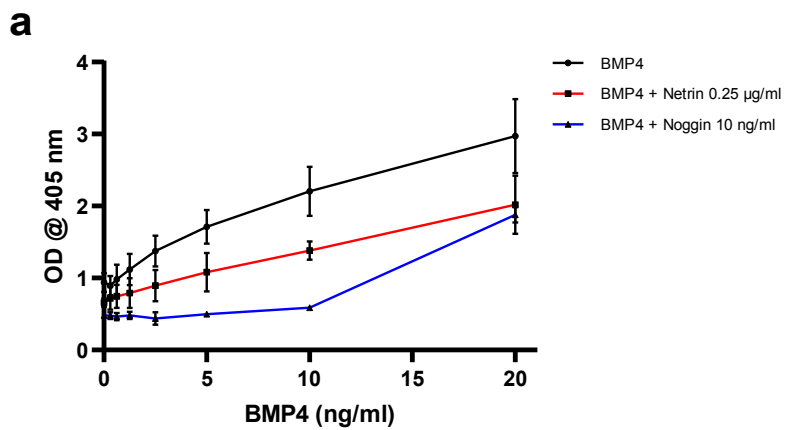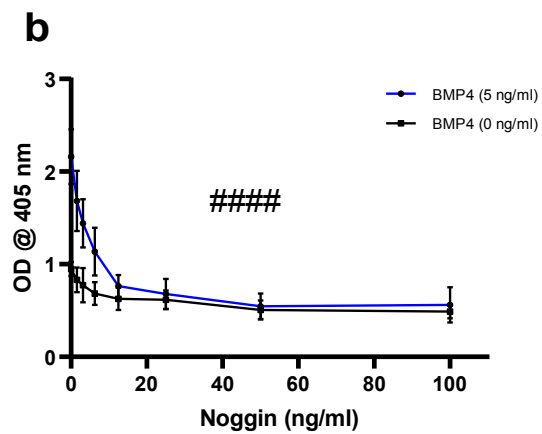



# Supplementary Figure S10

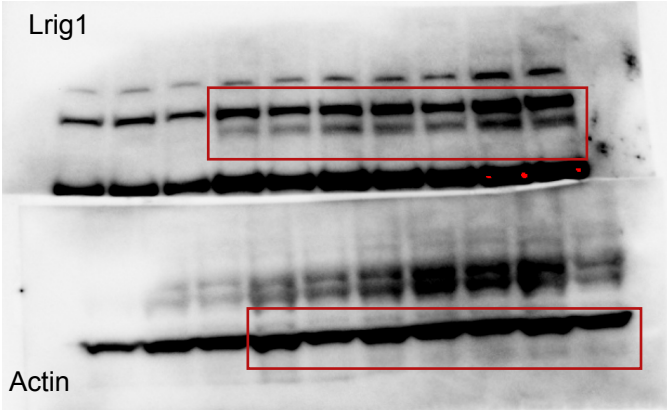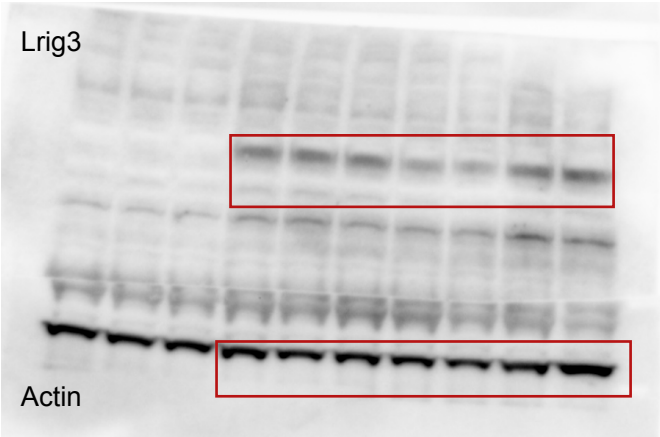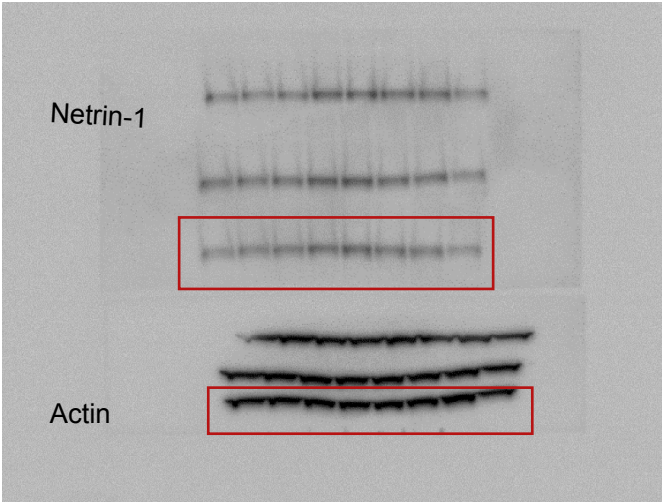

# Supplementary Figure S11

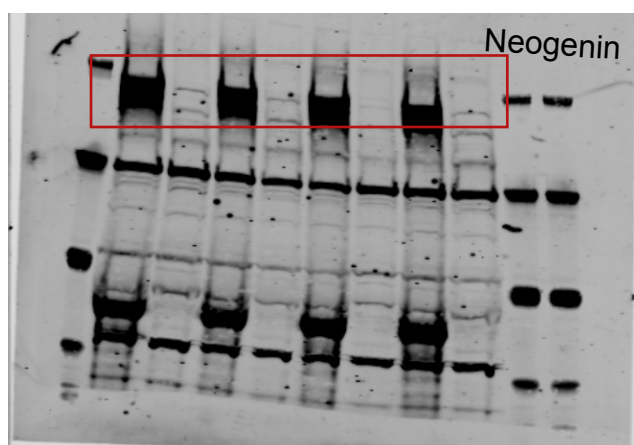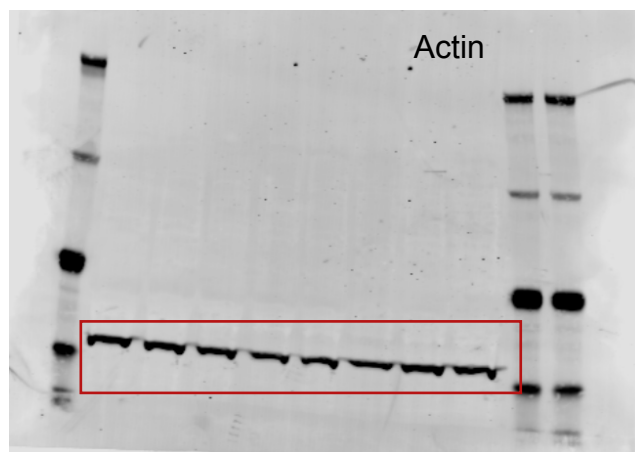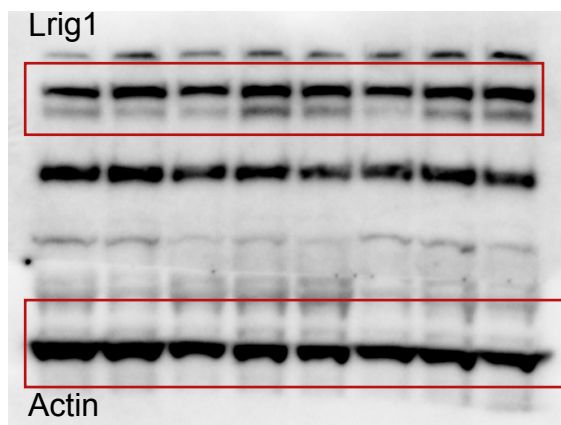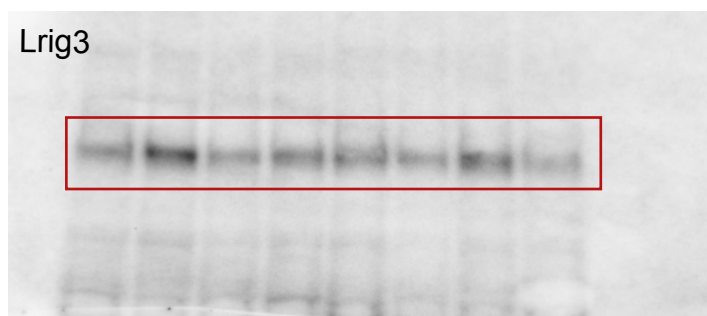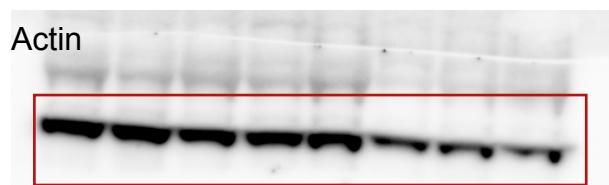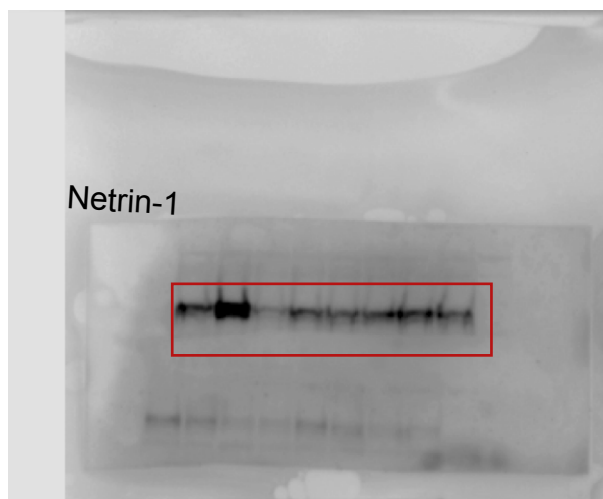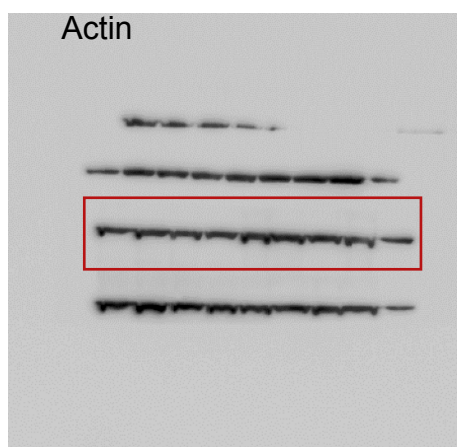

# Supplementary Figure S12

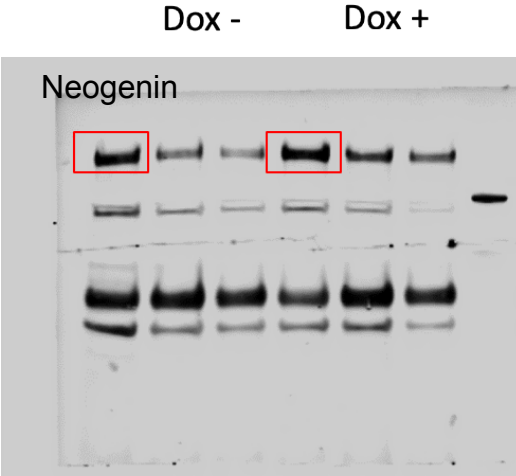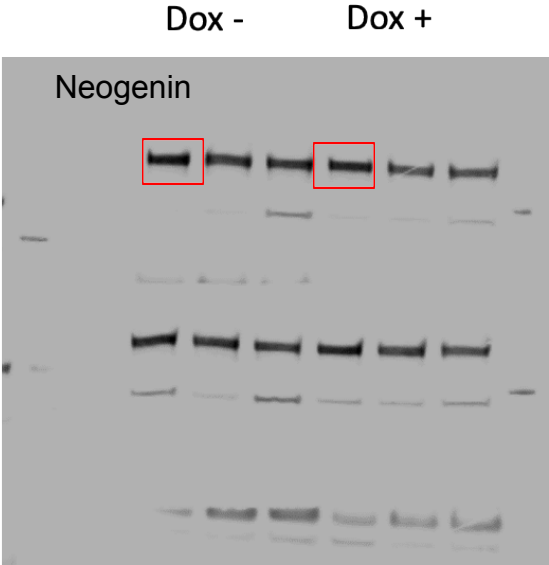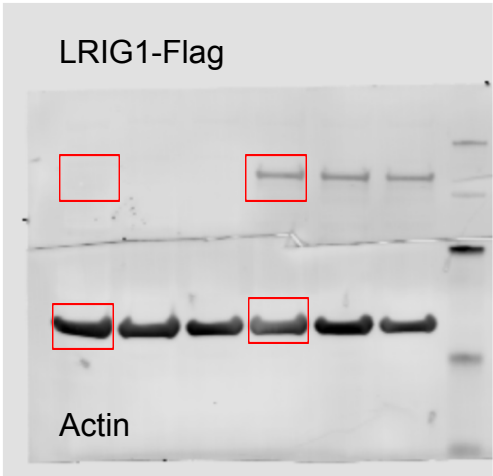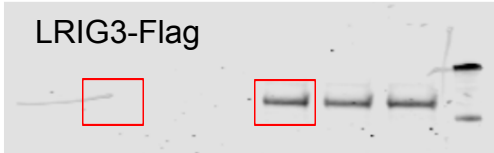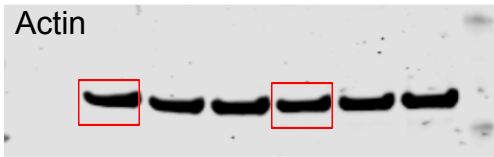

Supplement: 41598_2021_87949_MOESM1_ESM.pdf [file 41598_2021_87949_MOESM1_ESM.pdf]
